# Supplementary material for: RNA Profiling of Mouse Ependymal Cells after Spinal Cord Injury Identifies the Oncostatin Pathway as a Potential Key Regulator of Spinal Cord Stem Cell Fate
Source: MDPI journal article supplement (doi:10.3390/cells10123332), 2021-11-27
Supplement: s1 [file s1]

A

## FIGURE S2

## Osm - Mus musculus

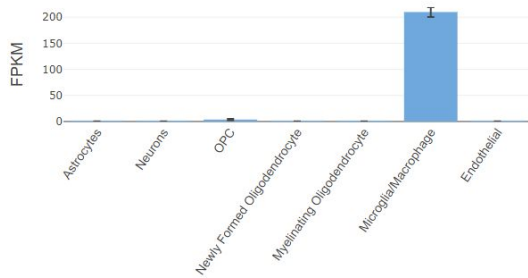

## OSM - Homo sapiens

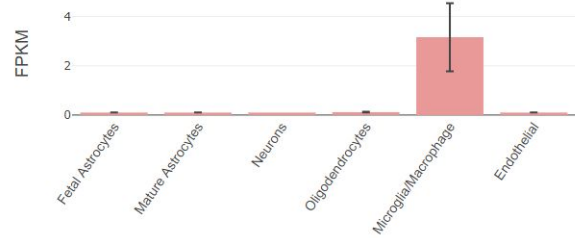

B

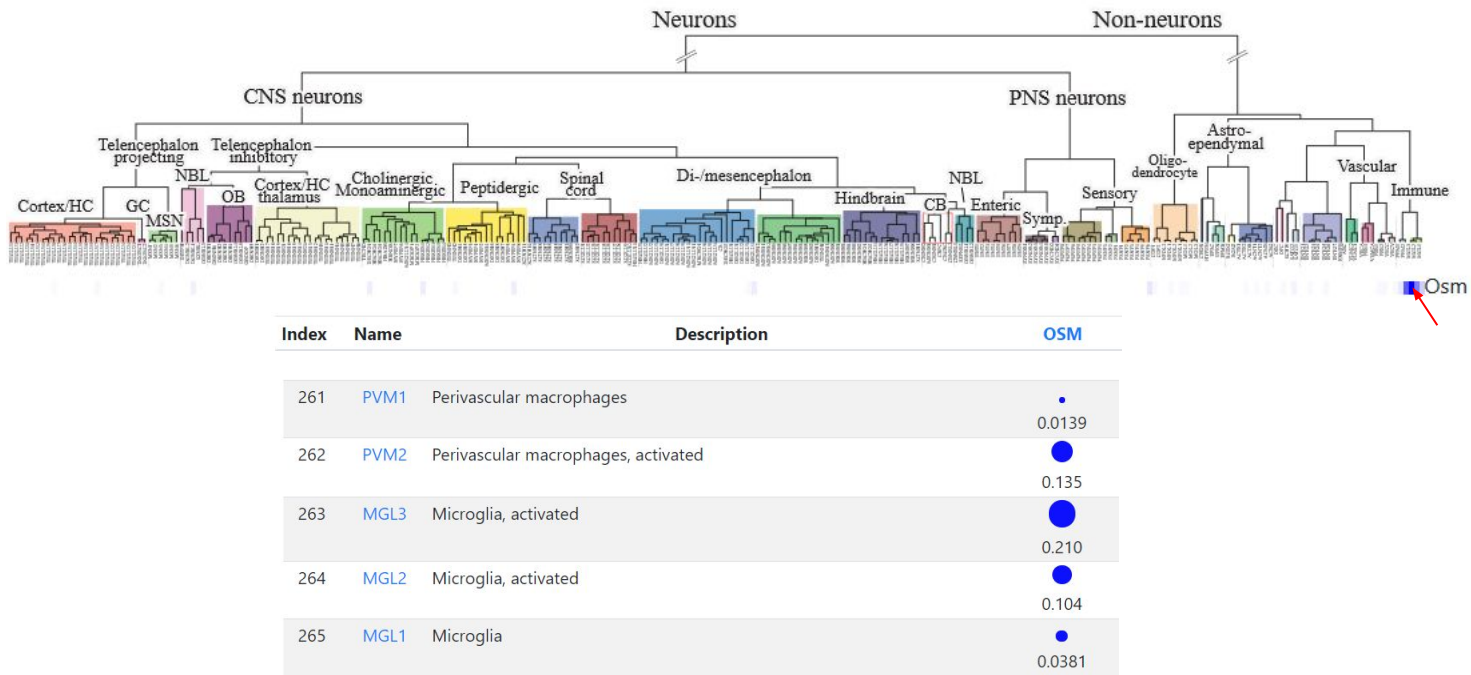

C

## RNA levels after SCI

(adapted from data published in Chen K et al, PLoS One. 2013 Aug 9;8(8):e72567)

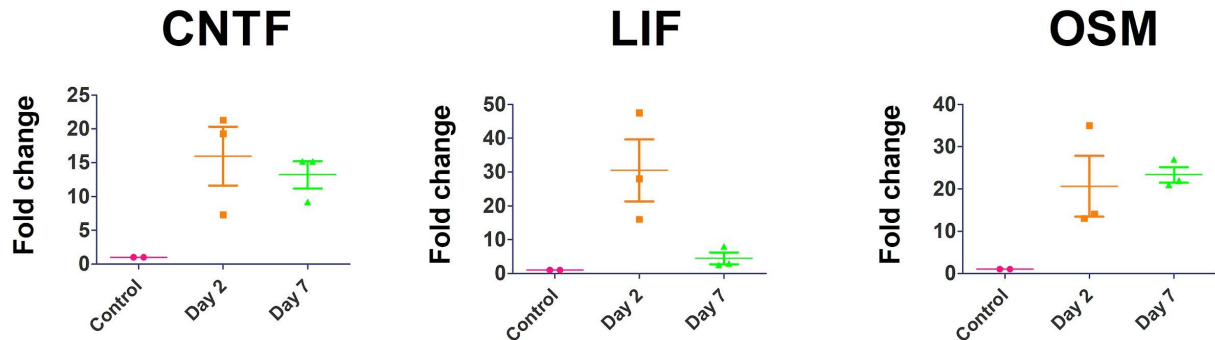

**Figure S2: OSM expression in normal and injured CNS.** **A:** In human and mouse CNS atlas (Brain RNA seq database Ben Barres's lab) OSM is specifically expressed in microglial cells. These images are derived from the database (brainrnaseq.org) associated to this publication (Zhang, et al. Neuron (2016) Jan 6;89(1):37-53). **B:** *Upper panel:* Single cell RNA expression confirms that OSM is mainly expressed by immune cells (microglia and macrophage) in the mouse CNS. These data were obtained from the database (mousebrain.org) associated to this publication (Zeisel et al, Cell. (2018) Aug 9;174(4):999-1014). Adult cell subtypes showing OSM expression are indicated by a blue rectangle under the hierarchical tree. Red arrow points to the microglia and macrophage subpopulations. *Lower panel:* Quantitative expression of OSM in these cells is presented as a blue circle and underneath value. **C:** Expression of *Cntf*, *Lif* and *Osm* cytokines by RNA seq after acute spinal cord injury. Data represent fold change compared to non injured spinal cord (control). These data were plotted after extraction from the database associated to this publication (Chen K et al, PloS One. (2013) Aug 9;8(8):e72567)

## FIGURE S3

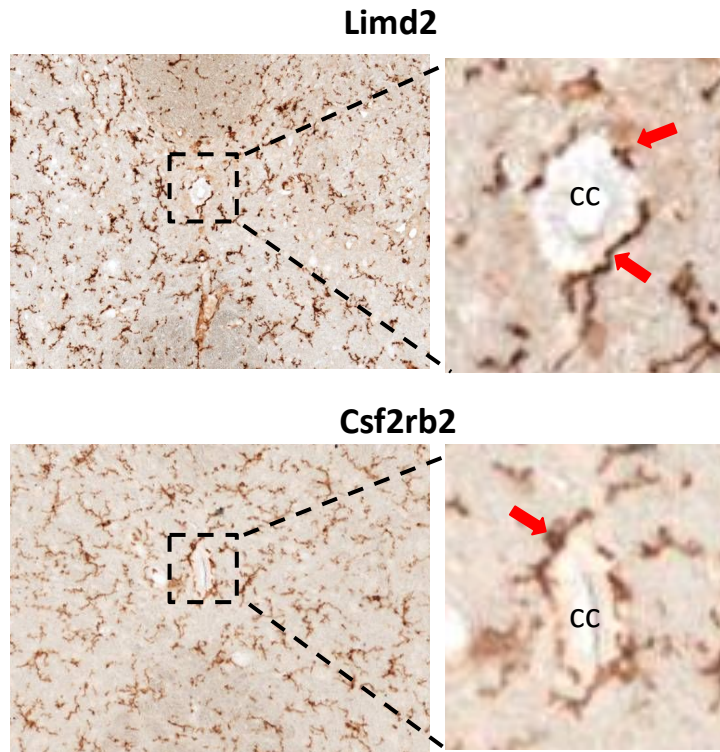

**Figure S3: Microglia around the spinal cord central canal region.** Images imported from the Gensat expression database (gensat.org, Heintz N et al, (2004), Nat Neurosci. May;7(5):483) for 2 microglia specific genes (*Limd2* and *Csf2rb2*). Brown stainings are IHC for GFP protein expressed under the control of *Limd2* and *Csf2rb2* promoters. Right-hand images are high magnification of the central canal region (cc). Red arrows indicate microglial processes surrounding the ependymal region.
