# Supplementary material for: RNA Profiling of Mouse Ependymal Cells after Spinal Cord Injury Identifies the Oncostatin Pathway as a Potential Key Regulator of Spinal Cord Stem Cell Fate
Source: MDPI journal article supplement (doi:10.3390/cells10123332), 2021-11-27
Supplement: s1 [file s1]

**Table S2**  
**Antibodies**

| <i>Name</i>               | <i>Specie</i> | <i>Supplier</i>           | <i>Reference</i> | <i>Dilution for IF</i> | <i>Dilution for WB</i> |
|---------------------------|---------------|---------------------------|------------------|------------------------|------------------------|
| <b>β-ACTIN</b>            | Mouse         | Cell Signaling Technology | 8H10D10          | N.A.                   | 1/1000                 |
| <b>FOXJ1</b>              | Mouse         | eBioscience               | 14-9965-82       | 1/100                  | N.A.                   |
| <b>GFAP</b>               | Rabbit        | Dako                      | Z0334            | 1/2000                 | 1/5000                 |
| <b>GFP</b>                | Rabbit        | Abcam                     | ab183734         | 1/500                  | N.A.                   |
| <b>KI67</b>               | Mouse         | Pharmingen                | 556003           | 1/500                  |                        |
| <b>NETRIN</b>             | Rabbit        | Abcam                     | ab126729         | 1/500                  | N.A.                   |
| <b>OLIG1</b>              | Goat          | R&D                       | AF2417           | 1/100                  | N.A.                   |
| <b>OSMR</b>               | Goat          | R&D                       | AF662-SP         | 1/500                  | 1/1000                 |
| <b>p-ERK</b>              | Rabbit        | Cell Signaling Technology | 4370             | 1/200                  | N.A.                   |
| <b>p-STAT3</b>            | Rabbit        | Cell Signaling Technology | #9131            | 1/500                  | 1/250                  |
| <b>TAG</b><br>(DYKDDDDK ) | Mouse         | Supernatant               | HB-9259          | 1/500                  | N.A.                   |

# Primers

| <b><i>Name</i></b>    | <b><i>Specie</i></b> | <b><i>Forward</i></b> | <b><i>Reverse</i></b>  | <b><i>Size</i></b> |
|-----------------------|----------------------|-----------------------|------------------------|--------------------|
| <b><i>b-Actin</i></b> | Mouse                | GGCTGTATTCCCCTCCATCG  | CCAGTTGGTAACAATGCCATGT | 154                |
| <b><i>Cntf</i></b>    | Mouse                | GGTGACTTCCATCAGGCAAT  | CCATCAGCCTCTTTTTCAGG   | 116                |
| <b><i>Lif</i></b>     | Mouse                | AGAAGGTCCTGAACCCCACT  | CCACACGGTACTTGTTGCAC   | 117                |
| <b><i>Osm</i></b>     | Mouse                | TCAGGGGTCTGATGACACAA  | GAGAGAGCACCGGATCAGAC   | 160                |
| <b><i>Osmr</i></b>    | Mouse                | CATCCCGAAGCGAAGTCTTGG | GGCTGGGACAGTCCATTCTAAA | 110                |
| <b><i>Tnfa</i></b>    | Mouse                | AGGGGATTATGGCTCAGGGT  | GAGTCCTTGATGGTGGTGCA   | 120                |
